# Supplementary material for: Theanine Improves High-Dose Epigallocatechin-3-Gallate-Induced Lifespan Reduction in Caenorhabditis elegans
Source: MDPI journal article supplement (doi:10.3390/foods10061404), 2021-06-17
Supplement: s1 [file s1]

**Table S1 (related to Figure 1A, 1B, 1C, 1D, 1E)**

| Treatment<br>(N2/20°C) | Concen-<br>trations<br>( $\mu$ M) | Mean Lifespan(d)<br>$\pm$ SEM(P Value) | Median Lifespan(d)<br>$\pm$ SEM(P Value) | N   |
|------------------------|-----------------------------------|----------------------------------------|------------------------------------------|-----|
| GA                     | 0                                 | 24.9 $\pm$ 0.5 (n.s.)                  | 25.0 $\pm$ 0.4 (n.s.)                    | 100 |
|                        | 50                                | 24.7 $\pm$ 0.5 (n.s.)                  | 25.0 $\pm$ 0.4 (n.s.)                    | 95  |
|                        | 100                               | 25.1 $\pm$ 0.5 (n.s.)                  | 25.0 $\pm$ 0.5 (n.s.)                    | 98  |
|                        | 200                               | 25.5 $\pm$ 0.4 (n.s.)                  | 25.0 $\pm$ 0.4 (n.s.)                    | 99  |
|                        | 500                               | 25.6 $\pm$ 0.4 (n.s.)                  | 25.0 $\pm$ 0.4 (n.s.)                    | 95  |
|                        | 1000                              | 26.2 $\pm$ 0.4 (<0.1)                  | 27.0 $\pm$ 0.5 (<0.1)                    | 95  |
| EGC                    | 0                                 | 23.3 $\pm$ 0.5 (n.s.)                  | 24.0 $\pm$ 0.5 (n.s.)                    | 105 |
|                        | 50                                | 22.6 $\pm$ 0.5 (n.s.)                  | 24.0 $\pm$ 0.6 (n.s.)                    | 95  |
|                        | 100                               | 23.0 $\pm$ 0.4 (n.s.)                  | 24.0 $\pm$ 0.4 (n.s.)                    | 105 |
|                        | 200                               | 23.5 $\pm$ 0.4 (n.s.)                  | 24.0 $\pm$ 0.2 (n.s.)                    | 105 |
|                        | 500                               | 23.2 $\pm$ 0.4 (n.s.)                  | 24.0 $\pm$ 0.2 (n.s.)                    | 105 |
|                        | 1000                              | 23.2 $\pm$ 0.4 (n.s.)                  | 24.0 $\pm$ 0.2 (n.s.)                    | 101 |
| EC                     | 0                                 | 24.3 $\pm$ 0.2 (n.s.)                  | 25.0 $\pm$ 0.3 (n.s.)                    | 105 |
|                        | 50                                | 24.2 $\pm$ 0.3(n.s.)                   | 25.0 $\pm$ 0.4 (n.s.)                    | 105 |
|                        | 100                               | 24.4 $\pm$ 0.3 (n.s.)                  | 25.0 $\pm$ 0.4 (n.s.)                    | 105 |
|                        | 200                               | 24.3 $\pm$ 0.4 (n.s.)                  | 25.0 $\pm$ 0.4 (n.s.)                    | 105 |
|                        | 500                               | 24.7 $\pm$ 0.4 (n.s.)                  | 25.0 $\pm$ 0.4 (n.s.)                    | 98  |
|                        | 1000                              | 24.9 $\pm$ 0.5 (n.s.)                  | 26.0 $\pm$ 0.4 (n.s.)                    | 105 |
| ECG                    | 0                                 | 27.3 $\pm$ 0.6 (n.s.)                  | 28.0 $\pm$ 0.8 (n.s.)                    | 105 |
|                        | 50                                | 29.1 $\pm$ 0.6 (n.s.)                  | 30.0 $\pm$ 0.6 (n.s.)                    | 96  |

|      |      |                    |                     |     |
|------|------|--------------------|---------------------|-----|
|      | 100  | 27.5 ±0.6 (n.s.)   | 28.0 ±0.5 (n.s.)    | 105 |
|      | 200  | 27.9 ±0.8 (n.s.)   | 28.0 ±0.7 (n.s.)    | 105 |
|      | 500  | 28.5 ±0.7 (n.s.)   | 30.0 ±0.6 (n.s.)    | 100 |
|      | 1000 | 30.7 ±0.7 (<0.001) | 32.0 ±1.2 (<0.001.) | 105 |
| EGCG | 0    | 24.2 ±0.5 (n.s.)   | 25.0 ±0.6 (n.s.)    | 105 |
|      | 50   | 24.8 ±0.5 (n.s.)   | 25.0 ±0.5 (n.s.)    | 105 |
|      | 100  | 26.4 ±0.4 (<0.01)  | 27.0 ±0.5 (<0.01)   | 100 |
|      | 200  | 26.6 ±0.4 (<0.001) | 27.0 ±0.4 (<0.001)  | 100 |
|      | 500  | 23.8 ±0.5 (n.s.)   | 25.0 ±1.0 (n.s.)    | 97  |
|      | 1000 | 21.3 ±0.7 (<0.001) | 23.0 ±0.8 (<0.001)  | 102 |

n.s.= not significant

N = total worm number

P value compared to the Control (0) group

**Table S2 (related to Figure 2A, 2B, 2C, 2D, 2E, 2F)**

| Treatment (N2/20°C)     | Mean Lifespan(d)<br>±SEM(P Value) | Median Lifespan(d)<br>±SEM(P Value) | N   |
|-------------------------|-----------------------------------|-------------------------------------|-----|
| Control                 | 25.2 ±0.5 (n.s.)                  | 27.0 ±0.4 (n.s.)                    | 105 |
| EGCG 1000μM             | 22.3 ±0.3 (<0.001)                | 23.0 ±0.6 (<0.001)                  | 95  |
| EGCG 1000μM +CAF 5mM    | 20.1 ±0.5 (<0.001)                | 21.0 ±0.5 (<0.001)                  | 95  |
| EGCG 1000μM +CAF 10mM   | 22.5 ±0.4 (<0.001)                | 24.0 ±0.4 (<0.001)                  | 95  |
| Control                 | 23.5 ±0.5 (n.s.)                  | 24.0 ±0.5 (n.s.)                    | 105 |
| EGCG 200μM              | 25.1 ±0.5 (<0.01)                 | 26.0 ±0.4 (<0.01)                   | 105 |
| EGCG 200μM +CAF 5mM     | 25.0 ±0.4 (<0.01)                 | 26.0 ±0.2 (<0.01)                   | 102 |
| EGCG 200μM +CAF 10mM    | 24.8 ±0.5 (<0.01)                 | 26.0 ±0.4 (<0.01)                   | 102 |
| Control                 | 21.4 ±0.5 (n.s.)                  | 21.0 ±0.5 (n.s.)                    | 104 |
| EGCG 1000μM             | 17.5 ±0.5 (<0.001)                | 19.0 ±0.5 (<0.001)                  | 95  |
| EGCG 1000μM +THA 200μM  | 20.7 ±0.6 (n.s.)                  | 21.0 ±0.8 (n.s.)                    | 98  |
| EGCG 1000μM +THA 500μM  | 21.2 ±0.6 (n.s.)                  | 21.0 ±0.6 (n.s.)                    | 98  |
| Control                 | 22.5 ±0.5(n.s.)                   | 23.0 ±0.5 (n.s.)                    | 104 |
| EGCG 200μM              | 26.4 ±0.6 (<0.001)                | 26.0 ±0.5(<0.001)                   | 100 |
| EGCG 200μM +THA 200μM   | 24.7 ±0.5 (<0.001)                | 25.0 ±0.5 (<0.001)                  | 105 |
| EGCG 200μM +THA 500μM   | 24.6 ±0.4 (<0.001)                | 25.0 ±0.5(<0.001)                   | 105 |
| Control                 | 23.4 ±0.7 (n.s.)                  | 24.0 ±0.6 (n.s.)                    | 105 |
| EGCG 1000μM             | 19.7 ±0.5 (<0.001)                | 20.0 ±0.6 (<0.001)                  | 95  |
| Gln 1000μM              | 23.5 ±0.7 (n.s.)                  | 26.0 ±0.7 (n.s.)                    | 102 |
| EGCG 1000μM +Gln 1000μM | 26.6 ±0.6 (n.s.)                  | 24.0 ±0.5 (n.s.)                    | 103 |
| Control                 | 23.1 ±0.5 (n.s.)                  | 23.0 ±0.4 (n.s.)                    | 100 |

|            |                  |                  |     |
|------------|------------------|------------------|-----|
| THA 200μM  | 23.6 ±0.4 (n.s.) | 23.0 ±0.5 (n.s.) | 98  |
| THA 500μM  | 23.5 ±0.5 (n.s.) | 24.0 ±0.6 (n.s.) | 99  |
| THA 1000μM | 23.2 ±0.5 (n.s.) | 23.0 ±0.5 (n.s.) | 102 |

n.s.= not significant

N = total worm number

P value compared to the Control (0) group

**Table S3 (related to Figure 4C, 4D)**

| Treatment                                   | Mean Lifespan(d)<br>±SEM(P Value) | Median Lifespan(d)<br>±SEM(P Value) | N   |
|---------------------------------------------|-----------------------------------|-------------------------------------|-----|
| Control (N2/20°C)                           | 20.9 ±0.7 (n.s.)                  | 22.0 ±0.6 (n.s.)                    | 105 |
| EGCG 1000μM (N2/20°C)                       | 19.3 ±0.6 (<0.01)                 | 20.0 ±0.6 (<0.01)                   | 95  |
| NAC 5mM (N2/20°C)                           | 21.0 ±0.7(n.s.)                   | 22.0 ±1.1 (n.s.)                    | 95  |
| EGCG 1000μM +NAC 5mM<br>(N2/20°C)           | 21.1 ±0.6 (n.s.)                  | 22.0 ±0.4 (n.s.)                    | 95  |
| EGCG 1000μM +NAC 5Mm+THA<br>200μM (N2/20°C) | 21.3 ±0.7 (n.s.)                  | 22.0 ±0.7 (n.s.)                    | 102 |
| Control (SOD-3/20°C)                        | 21.2 ±0.5 (n.s.)                  | 21.0 ±0.6 (n.s.)                    | 105 |
| EGCG 1000μM (SOD-3/20°C)                    | 19.1 ±0.5 (<0.01)                 | 19.0 ±0.9 (<0.01)                   | 95  |
| EGCG 1000μM + THA 200μM<br>(SOD-3/20°C)     | 21.7 ±0.6 (n.s.)                  | 23.0 ±0.8 (n.s.)                    | 100 |
| THA 200μM (SOD-3/20°C)                      | 21.6 ±0.5 (n.s.)                  | 21.0 ±0.8 (n.s.)                    | 100 |

n.s.= not significant

N = total worm number

P value compared to the Control (0) group

**Table S4 (related to Figure5A, 5B)**

| Treatment                                | Mean Lifespan(d)<br>±SEM(P Value) | Median Lifespan(d)<br>±SEM(P Value) | N  |
|------------------------------------------|-----------------------------------|-------------------------------------|----|
| Control (DAF-2/20°C)                     | 52.2 ±1.5 (n.s.)                  | 53.0 ±1.7 (n.s.)                    | 95 |
| EGCG 1000μM (DAF-2/20°C)                 | 46.6 ±1.5 (<0.01)                 | 47.0 ±1.2 (<0.01)                   | 95 |
| EGCG 1000μM + THA 200μM<br>(DAF-2/20°C)  | 45.5 ±1.5 (<0.01)                 | 45.0 ±1.6 (<0.01)                   | 95 |
| THA 200μM (DAF-2/20°C)                   | 51.5 ±1.4 (n.s.)                  | 53.0 ±1.8 (n.s.)                    | 95 |
| Control (DAF-16/20°C)                    | 20.4 ±0.5 (n.s.)                  | 21.0 ±0.5 (n.s.)                    | 95 |
| EGCG 1000μM (DAF-16/20°C)                | 18.9 ±0.5 (<0.01)                 | 19.0 ±0.5 (<0.01)                   | 95 |
| EGCG 1000μM + THA 200μM<br>(DAF-16/20°C) | 19.1 ±0.5 (n.s.)                  | 19.0 ±0.5 (n.s.)                    | 95 |
| THA 200μM (DAF-16/20°C)                  | 20.6 ±0.5 (n.s.)                  | 21.0 ±0.5 (n.s.)                    | 96 |

n.s.= not significant

N = total worm number

P value compared to the Control (0) group

**Figure S1 (related to Figure5D)**

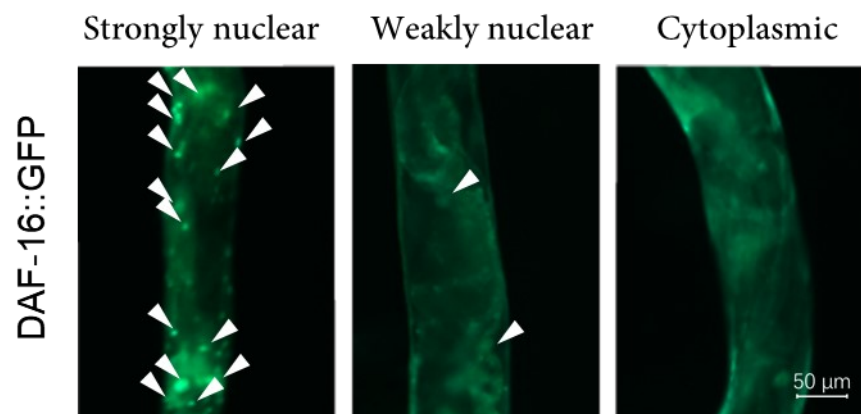

Figure S1 Representative images for DAF-16::GFP localization, each worm was given a score: cytoplasmic, 0; weakly nuclear, 1; strongly nuclear, 2.
